# Supplementary material for: Identification of GSK3β inhibitor kenpaullone as a temozolomide enhancer against glioblastoma
Source: PubMed Central journal article supplement (PMC6624278; doi:10.1038/s41598-019-46454-8), 2019-07-11
Supplement: 41598_2019_46454_MOESM1_ESM.pdf [file 41598_2019_46454_MOESM1_ESM.pdf]

# Identification of GSK3 $\beta$ inhibitor kenpaullone as a temozolomide enhancer against glioblastoma

Tomohiro Kitabayashi<sup>1</sup>, Yu Dong<sup>1,5</sup>, Takuya Furuta<sup>2</sup>, Hemragul Sabit<sup>1</sup>, Shabierjiang Jiapaer<sup>1</sup>, Zhang Jiakang<sup>1,5</sup>, Zhang Guangtao<sup>1,6</sup>, Yasuhiko Hayashi<sup>1</sup>, Masahiko Kobayashi<sup>3</sup>, Takahiro Domoto<sup>4</sup>, Toshinari Minamoto<sup>4</sup>, Atsushi Hirao<sup>3</sup>, and Mitsutoshi Nakada<sup>1\*</sup>

<sup>1</sup> Department of Neurosurgery, Faculty of Medicine, Institute of Medical, Pharmaceutical and Health Sciences, Kanazawa University, Kanazawa, Japan

<sup>2</sup>Department of Pathology, Kurume University School of Medicine, Kurume, Japan

<sup>3</sup>Division of Molecular Genetics, Cancer Research Institute, Kanazawa University, Kanazawa, Japan

<sup>4</sup>Division of Translational and Clinical Oncology, Cancer Research Institute, Kanazawa University, Kanazawa, Japan

<sup>5</sup>Department of Neurosurgery, The First Affiliated Hospital of Harbin Medical University, Harbin, People's Republic of China

<sup>6</sup>Department of Neurosurgery, The First Hospital of Jilin University, Changchun, People's Republic of China

**\* Corresponding author:**

Mitsutoshi Nakada

**Supplementary Table 1. Source and working dilutions of the primary antibodies used in Western blotting, immunohistochemical and immunofluorescence staining**

| <b>Antibody</b>               | <b>MW (kDa)</b> | <b>Source</b> | <b>Working dilution</b> | <b>Company</b> |
|-------------------------------|-----------------|---------------|-------------------------|----------------|
| $\beta$ -actin                | 42              | Mouse         | 1:5000 (WB)             | WAKO           |
| CD44                          | 29-37           | Mouse         | 1:400 (IF)              | DAKO           |
| CD133                         | 97              | Mouse         | 1:400 (IF)              | R&D system     |
| CDK1                          | 34              | Mouse         | 1:1000 (WB)             | Cell Signaling |
| CDK2                          | 33              | Rabbit        | 1:1000 (WB)             | Cell Signaling |
| c-Myc                         | 49-57           | Rabbit        | 1:5000 (WB)             | abcam          |
| DNMT3A                        | 102-120         | Mouse         | 1:500 (WB)              | NOVUS          |
| GFAP                          | 55              | Rabbit        | 1:600 (IF)              | DAKO           |
| GSK3 $\beta$                  | 46              | Mouse         | 1:1000 (WB)             | BD Biosciences |
| pGSK3 $\beta$ <sup>Y216</sup> | 46              | Mouse         | 1:1000 (WB)             | BD Biosciences |
| pGSK3 $\beta$ <sup>Y216</sup> | 47              | Rabbit        | 1:2000 (IHC)            | abcam          |
| KLF4                          | 65              | Rabbit        | 1:1000 (WB)             | Cell Signaling |
| Nestin                        | 260             | Mouse         | 1:400 (IHC)             | BD Biosciences |
| Olig2                         | 32              | Rabbit        | 1:500 (IF)              | IBL            |
| PARP                          | 116             | Rabbit        | 1:1000 (WB)             | Cell Signaling |
| cleaved PARP                  | 89              | Rabbit        | 1:1000 (WB)             | Cell Signaling |
| SOX2                          | 34              | Rabbit        | 1:2000 (WB),            | Gene Tex       |
| Tuj1                          | 55              | Mouse         | 1:200 (IF)              | R&D system     |

Abbreviations: CDK1/2; cyclin-dependent kinase 1/2, DNMT3A; DNA methyltransferase 3A, GFAP; glial fibrillary acidic protein, GSK3 $\beta$ ; glycogen synthase kinase 3 $\beta$ , pGSK3 $\beta$ <sup>Y216</sup>; GSK3 $\beta$  phosphorylated in tyrosine (Y) 216 residue, WB; Western blotting, IF; immunofluorescence, IHC; immunohistochemistry, KLF4; Kruppel-like factor 4, PARP; poly ADP-ribose polymerase, SOX2; SRY (sex determining region Y)-box 2

Supplementary Figure 1. Stemness, differentiation, and tumor-initiating ability of KGS03.

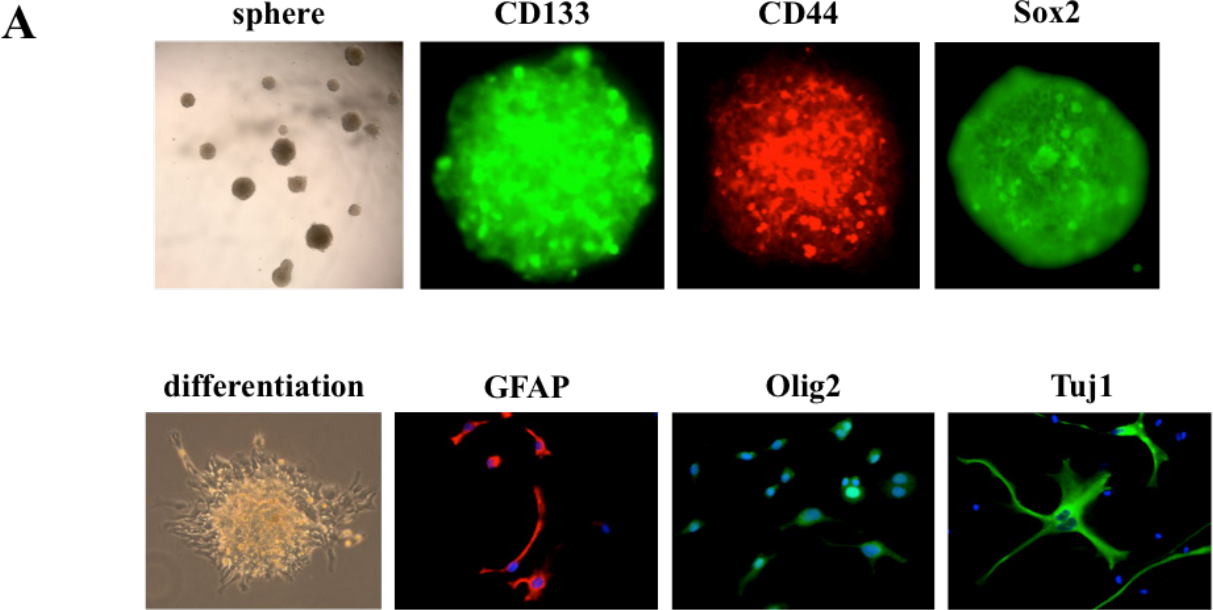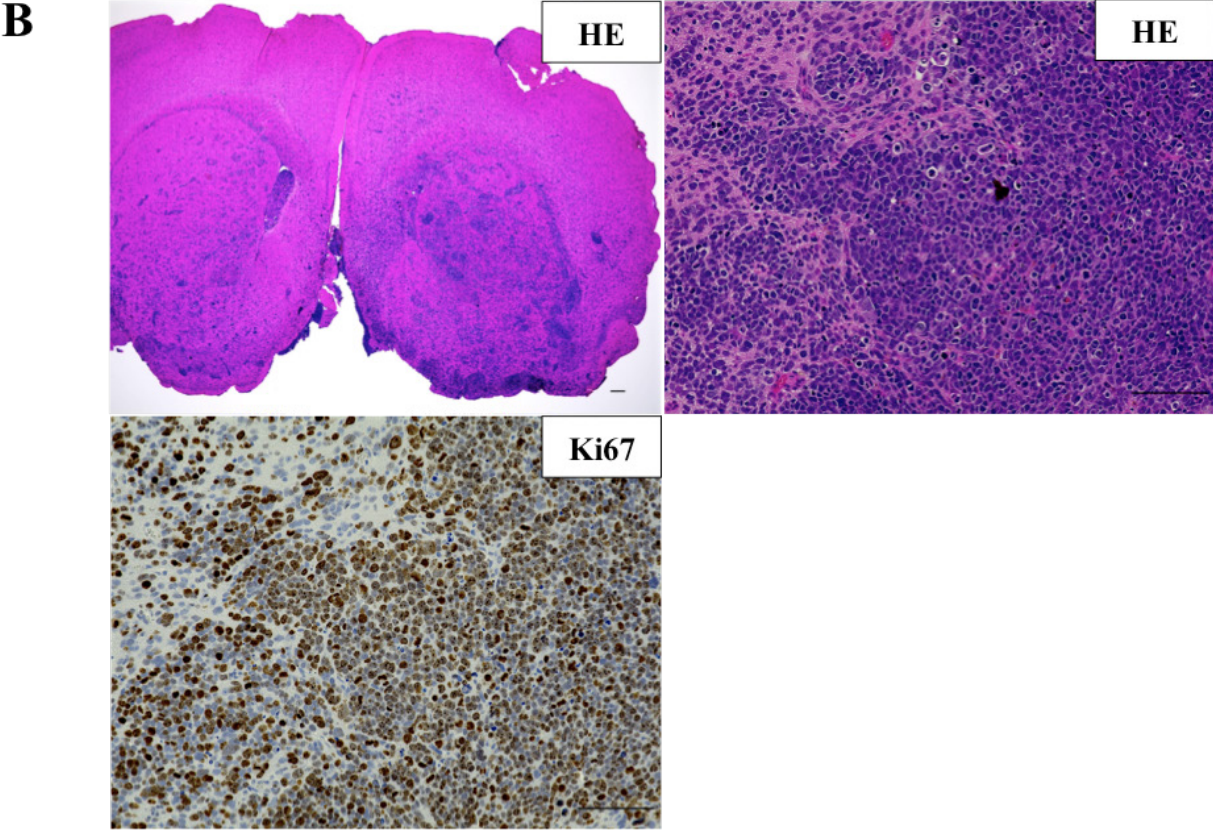

**A**, Tumor spheres derived from a GBM surgical specimen (KGS03) were positively stained for CD133, CD44, and SOX2, which are the characteristic markers of mesenchymal-type stem cells (upper panels). Magnification,  $\times 400$ . Tumor spheres differentiated into GFAP- and Olig2-positive astrocyte-like cells and Tuj1-positive neuron-like cells in DMEM supplemented with 10% FBS (lower panels). Magnification,  $\times 200$ . **B**, KGS03 cells ( $5 \times 10^4$ ) were transplanted into the mouse brain. A brain tumor developed 60 days following transplantation and histologically recapitulated the features of the original GBM. *Scale bar* = 100  $\mu\text{m}$ .

**Supplementary Figure 2. Western blotting analysis to investigate the effects of kenpaullone on GSK3 $\beta$  and CDKs in GBM cell lines.**

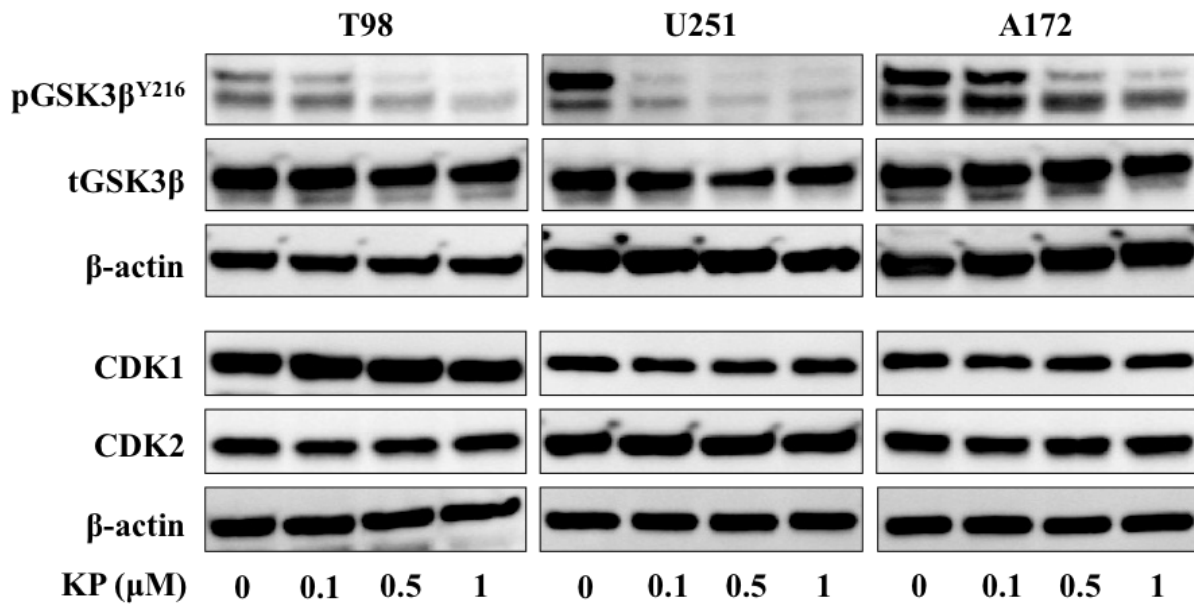

GBM (T98, U251, and A172) cells were treated with either DMSO (0) or kenpaullone (KP) at the indicated concentrations for 24 h. Phosphorylation and expression of GSK3 $\beta$  and expression of CDK1 and CDK2 in the respective cells were examined by Western blotting. Expression of  $\beta$ -actin was monitored as a loading control. Bands were cropped from different parts of the same gel, or from different gels.
